# Supplementary material for: A Systematic Review of Economic Evidence on Community Hypertension Interventions
Source: PubMed Central journal article supplement — Am J Prev Med. Author manuscript; Available in PMC 2018 Feb 20. (PMC5819001; doi:10.1016/j.amepre.2017.05.008), 2017-12
Supplement: NIHMS939662-supplement-1.pdf [file NIHMS939662-supplement-1.pdf]

**Appendix**  
**A Systematic Review of Economic Evidence on Community Hypertension Interventions**  
**Zhang et al.**

**Appendix Table 1.** Cost-Effectiveness of Community-Based Interventions for Hypertension Control, 1995–2015 (N=34)

| Author, Year, Country                                | Intervention                                                                                                                                                                       | Provider                   | ICER/ Net savings (2014 dollar value)                                                                                                                  | Conclusion by authors                                      |
|------------------------------------------------------|------------------------------------------------------------------------------------------------------------------------------------------------------------------------------------|----------------------------|--------------------------------------------------------------------------------------------------------------------------------------------------------|------------------------------------------------------------|
| U.S.-based studies                                   |                                                                                                                                                                                    |                            |                                                                                                                                                        |                                                            |
| Educational interventions for lifestyle modification |                                                                                                                                                                                    |                            |                                                                                                                                                        |                                                            |
| Datta et al., 2010                                   | A 2-year randomized trial, along with a decision model: tailored educational information bimonthly for 2 years via telephone for hypertensive patients                             | Non-physician (nurses)     | (1) \$58,610/LYS for normal-weight women, \$120,513/LYS for normal-weight men; (2) \$60,142/LYS for overweight men; \$80,839/LYS for overweight women. | Cost-effective for overweight male and normal-weight women |
| Troyer, 2010                                         | A 1-year randomized trial: medical nutrition therapy (MNT) or therapeutic meals for people aged $\geq 60$ years with hypertension or hyperlipidemia                                | Non-physician (dietitians) | (1) \$134,611/QALY for Meals only; (2) \$59,174/QALY for MNT; (3) \$305,187/QALY for Meals + MNT                                                       | Cost-effective for meals only or MNT only                  |
| Sacks et al., 2009                                   | A 1 year observational study: an employer-sponsored, Internet-based diet and exercise program for patients with cardiovascular conditions (diabetes, hypertension, hyperlipidemia) | Non-physician (laypeople)  | Net savings \$999/person                                                                                                                               | Cost-saving                                                |
| Finkelstein et al., 2006                             | A before-and-after comparison: educators provide educational services to overweight and obese women                                                                                | Non-physician (laypeople)  | (1) \$714/1% CHD risk reduction; (2) \$6,683/LYG                                                                                                       | Cost-effective                                             |

**Appendix**  
**A Systematic Review of Economic Evidence on Community Hypertension Interventions**  
**Zhang et al.**

| Educational interventions for medication adherence support |                                                                                                                                                                                                        |                                          |                                                                                                                                            |                |
|------------------------------------------------------------|--------------------------------------------------------------------------------------------------------------------------------------------------------------------------------------------------------|------------------------------------------|--------------------------------------------------------------------------------------------------------------------------------------------|----------------|
| Kulchaitanaroaj et al., 2012                               | A 6-month randomized trial: A collaborative care program to provide direct patient care, assessment, recommendations and follow-up phone call for patients with hypertension                           | Physician and non-physician (pharmacist) | (1) \$40/mm Hg drop in SBP;<br>(2) \$103/mm Hg drop in DBP.                                                                                | Cost-effective |
| Nuckols et al., 2011                                       | A 2-year probability tree model: “improved care” of blood pressure management for 4,500 U.S. adults with hypertension                                                                                  | Physician                                | (1) \$937/person attaining treatment goals for moderate hypertension<br>(2) \$994/person attaining treatment goals for severe hypertension | Cost-effective |
| Johannigman et al., 2010                                   | A 1-year before-and-after comparison: a structured medication therapy management (MTM) session and health education for patients with diabetes, hypertension, asthma, heart failure, or hyperlipidemia | Non-physician (pharmacist)               | (1) Direct medical savings \$306/person;<br>(2) Total savings \$1,221/person.                                                              | Cost-saving    |
| Bunting et al., 2008                                       | A 6-year before-and-after comparison: risk reduction education; regular, long-term                                                                                                                     | Non-physician (pharmacist)               | Net savings \$109/person annually                                                                                                          | Cost-saving    |

**Appendix**  
**A Systematic Review of Economic Evidence on Community Hypertension Interventions**  
**Zhang et al.**

|                                                                               |                                                                                                                                                                                                           |                                                 |                                                                                                    |                                     |
|-------------------------------------------------------------------------------|-----------------------------------------------------------------------------------------------------------------------------------------------------------------------------------------------------------|-------------------------------------------------|----------------------------------------------------------------------------------------------------|-------------------------------------|
|                                                                               | follow-ups for patients with hypertension                                                                                                                                                                 |                                                 |                                                                                                    |                                     |
| Munroe et al., 1997                                                           | A 1-year observational study: targeted patient education, feedback and behavior modification, and communicate regularly with patients' physicians to enable early intervention for drug-related problems. | Non-physician (pharmacist)                      | Net savings \$3,581–\$7,299/person                                                                 | Cost-saving                         |
| Educational interventions for lifestyle modification and medication adherence |                                                                                                                                                                                                           |                                                 |                                                                                                    |                                     |
| Allen et al., 2014                                                            | A 3-year randomized trial: tailored educational counselling for lifestyle modification, medication adherence for patients with CVD, type 2 diabetes and hypertension                                      | Non-physician (nurses/community health workers) | (1) \$114/mm Hg drop in SBP;<br>(2) \$236/mm Hg drop in DBP.                                       | Cost-effective                      |
| Hollenbeak et al., 2014                                                       | A 6-month randomized trial with a Markov model in 10 years: Behavioral support and education through phone calls for African American patients aged 40–75 years with sustained, uncontrolled hypertension | Non-physician (peer coaches)                    | (1) \$512,510/CHD event;<br>(2) \$62/mm Hg drop in SBP;<br>(3) \$13,986/LYS;<br>(4) \$12,282/QALY. | Cost-effective depending on the WTP |

**Appendix**  
**A Systematic Review of Economic Evidence on Community Hypertension Interventions**  
**Zhang et al.**

| Self- monitoring interventions |                                                                                                                                                                                                                                                                                                                              |               |                                                                                                        |                |
|--------------------------------|------------------------------------------------------------------------------------------------------------------------------------------------------------------------------------------------------------------------------------------------------------------------------------------------------------------------------|---------------|--------------------------------------------------------------------------------------------------------|----------------|
| Ritzwoller et al., 2013        | A 2-year randomized trial: Self-monitoring, and goal-oriented weight loss and blood pressure control intervention with moderate intensity, followed up with phone calls to high risk, low-income, inner city, minority patients who were both hypertensive and obese (71% were black/African American and 13% were Hispanic) | Non-physician | \$727/mmHg drop in SBP                                                                                 | Cost-effective |
| Trogdon et al., 2012           | A 1-year and 10-year cost effectiveness model: patient education through interactive voice response technology and distribution of automated blood pressure monitors to high-risk plan members with uncontrolled hypertension                                                                                                | Non-physician | (1) \$965/person under control;<br>(2) \$52,769/LYG in 1 year;<br>(3) \$2,337/LYG annually in 10 years | Cost-effective |

**Appendix**  
**A Systematic Review of Economic Evidence on Community Hypertension Interventions**  
**Zhang et al.**

|                                                      |                                                                                                                                                                                                         |               |                                                                                                       |                                 |
|------------------------------------------------------|---------------------------------------------------------------------------------------------------------------------------------------------------------------------------------------------------------|---------------|-------------------------------------------------------------------------------------------------------|---------------------------------|
| Wang et al., 2012                                    | A 18-month randomized trial: telephone-based intervention groups using home BP tele monitoring for (1) behavioral management, (2) medication management, or (3) combined for patients with hypertension | Non-physician | Cost and effectiveness were not statistically significant between treatment group and control group   | Not cost-effective at 18 months |
| Screening interventions                              |                                                                                                                                                                                                         |               |                                                                                                       |                                 |
| Eddy et al., 2011                                    | The 12-year Archimedes Model: individualized guidelines in the context of blood pressure management, followed with drugs, office visits and tests to 15,792 participants aged 45–64 years               | Physician     | (1) RBR is 1.43 (1.33–1.70);<br>(2) RSR is 1.65 (1.52–2.79);<br>(3) Savings \$1.84 million            | Cost-saving                     |
| Wang et al., 2011                                    | A lifetime simulation model: Blood pressure screening and treatment in a cohort of 2,065,127 boys and 1,952,694 girls aged $\geq 15$ years                                                              | Physician     | Finding and treating the adolescents at highest risk (\$21,734/QALY [boys] and \$56,750/QALY [girls]) | Cost-effective                  |
| Non-U.S. studies                                     |                                                                                                                                                                                                         |               |                                                                                                       |                                 |
| Educational interventions for lifestyle modification |                                                                                                                                                                                                         |               |                                                                                                       |                                 |

**Appendix**  
**A Systematic Review of Economic Evidence on Community Hypertension Interventions**  
**Zhang et al.**

|                                 |                                                                                                                                                                                                                                                   |                                     |                                                                       |                |
|---------------------------------|---------------------------------------------------------------------------------------------------------------------------------------------------------------------------------------------------------------------------------------------------|-------------------------------------|-----------------------------------------------------------------------|----------------|
| Wang et al.,<br>2013, China     | A 1-year randomized trial: a customized, guideline-oriented training program including blood pressure measurements, risk factors, new cardiovascular and renal diseases, medical treatments, and lifestyle advices for patients with hypertension | Physician                           | Net savings \$32/person in urban sites, \$11/person in rural sites    | Cost-saving    |
| Barton et al.,<br>2012, UK      | A 6-month randomized trial: providing information, advice and support aimed at changing beliefs and behavior to participants aged 18 years with at least one of five CVD risk factors                                                             | Non-physician (lay health trainers) | \$17,215/QALY                                                         | Cost-effective |
| Jafar et al.,<br>2011, Pakistan | A randomized trial with a 2*2 factorial design: (1) combined home health education (HHE) plus trained general practitioner (GP); (2) HHE only; and (3) trained GP only to adults                                                                  | Physician                           | (1) \$29 (95% CI, \$8–\$125) /mm Hg drop in SBP;<br>\$1,543/ CVD DALY | Cost-effective |

**Appendix**  
**A Systematic Review of Economic Evidence on Community Hypertension Interventions**  
**Zhang et al.**

|                                                            |                                                                                                                                                                                                              |                                  |                                                                 |                    |
|------------------------------------------------------------|--------------------------------------------------------------------------------------------------------------------------------------------------------------------------------------------------------------|----------------------------------|-----------------------------------------------------------------|--------------------|
|                                                            | aged $\geq 40$ years with hypertension from middle- to low-income areas in Karac                                                                                                                             |                                  |                                                                 |                    |
| Perman et al., 2011, Argentina                             | A lifetime Markov model: providing personal and telephone contact with patients, support with non-pharmacological treatment such as diet and physical activity to middle-class patients aged $\geq 65$ years | Non-physician (medical students) | \$1,271/LYG                                                     | Cost-effective     |
| Yosefy et al., 2003, Israel                                | A 1-year before-and-after comparison: enhancing the control of modifiable risk factors and follow up high-risk hypertensive patients                                                                         | Physician                        | -\$1,566/QALY; Net savings \$942,608                            | Cost-saving        |
| Garcia-Pena et al., 2002, Mexico                           | A 6-month randomized trial: providing home visits who gave health and lifestyle advice to the subjects aged $\geq 60$ years                                                                                  | Non-physician (nurses)           | (1) \$2/mm Hg drop in SBP;<br>(2) \$2/mm Hg drop in DBP.        | Cost-effective     |
| Educational interventions for medication adherence support |                                                                                                                                                                                                              |                                  |                                                                 |                    |
| Schroeder et al., 2005, UK                                 | A 1-year randomized trial: A nurse-led adherence support in hypertension for                                                                                                                                 | Non-physician (nurses)           | Effectiveness was not statistically significant; More expensive | Not cost-effective |

**Appendix**  
**A Systematic Review of Economic Evidence on Community Hypertension Interventions**  
**Zhang et al.**

|                                                                               |                                                                                                                                                                                                                  |                                          |                                                                    |                |
|-------------------------------------------------------------------------------|------------------------------------------------------------------------------------------------------------------------------------------------------------------------------------------------------------------|------------------------------------------|--------------------------------------------------------------------|----------------|
|                                                                               | women and men with uncontrolled hypertension                                                                                                                                                                     |                                          |                                                                    |                |
| Edwa, 1998, South Africa                                                      | A 1-year before-and-after comparison: providing hypertension drug management following treatment guideline to hypertensive patients                                                                              | Physician and non-physician (pharmacist) | Net savings: \$321,441.                                            | Cost-saving    |
| Educational interventions for lifestyle modification and medication adherence |                                                                                                                                                                                                                  |                                          |                                                                    |                |
| Gaziano et al., 2014, South Africa                                            | A lifetime Markov model: home visits to increase hypertension adherence for individuals with hypertension and aged 25–74 years                                                                                   | Non-physician (community health workers) | \$321/DALY                                                         | Cost-effective |
| Bai et al., 2013, China                                                       | A 1-year before-and-after comparison: conducting educational sessions, supervision, and face-to-face consultation as necessary; standardize drug therapies; conduct follow-up visits to people with hypertension | Physician                                | \$0.62–\$0.85/mm Hg drop in SBP, \$1.08–\$1.66 /mm Hg drop in DBP. | Cost-effective |
| Houle et al., 2012, Canada                                                    | A 1-year simulation model: a pharmacist-nurse team along with a hypertension education brochure                                                                                                                  | Non-physician (pharmacist/ nurse)        | Net savings \$291/person for 1 year; \$243/person for 6 months     | Cost-saving    |



**Appendix**  
**A Systematic Review of Economic Evidence on Community Hypertension Interventions**  
**Zhang et al.**

|                                                 |                                                                                                                                                                                                                                |                             |                                                                          |                                                       |  |
|-------------------------------------------------|--------------------------------------------------------------------------------------------------------------------------------------------------------------------------------------------------------------------------------|-----------------------------|--------------------------------------------------------------------------|-------------------------------------------------------|--|
|                                                 | provide cardiovascular risk reduction counseling to hypertensive patients                                                                                                                                                      |                             |                                                                          |                                                       |  |
| Yamagishi et al., 2012, Japan                   | A 24-year observational study: a nation-wide, community-based intensive hypertension detection and control program in Japan                                                                                                    | Physician and non-physician | Net savings \$34,915/person                                              | Cost-saving                                           |  |
| Lim et al., 2011, South Korea                   | A 1-year probability tree model: providing health educations: stop-smoking and drinking, proper nutrition, importance of accurate medication, stress management, and continuous medication to adult patients with hypertension | Physician and non-physician | The net benefit -\$6,185; CBR was 1.3:1.                                 | Not cost-effective                                    |  |
| Huang Y, Ren J, 2010, China                     | A 3-year before-and-after comparison: providing a community-based prevention program to hypertension patients                                                                                                                  | Physician                   | CBR: 1:3.6                                                               | Cost-effective                                        |  |
| <b>Population-based screening interventions</b> |                                                                                                                                                                                                                                |                             |                                                                          |                                                       |  |
| Gu et al., 2015, China                          | A 10-year China CVD policy model: providing hypertension screening, essential medicines program                                                                                                                                | Physician                   | (1) Control blood pressure in all persons with CHD /stroke: cost-saving; | Cost-effective for treating all stage II hypertension |  |

**Appendix**  
**A Systematic Review of Economic Evidence on Community Hypertension Interventions**  
**Zhang et al.**

|                                         |                                                                                                                                                                                                         |                             |                                                                                                                                                         |                |
|-----------------------------------------|---------------------------------------------------------------------------------------------------------------------------------------------------------------------------------------------------------|-----------------------------|---------------------------------------------------------------------------------------------------------------------------------------------------------|----------------|
|                                         | implementation, hypertension control program administration to untreated hypertensive adults aged 35–84 years                                                                                           |                             | (2) Treat all stage II hypertension patients: \$9,000 (\$7,000–\$12,000)/QALY;<br>(3) Treat all stage II and stage I: \$13,000 (\$10,000–\$18,000)/QALY |                |
| Howard et al., 2010, Australia          | A lifetime Markov model: providing primary care screening for hypertension (between ages 50 and 69 years) plus intensive blood pressure management                                                      | Physician and non-physician | \$613/QALY                                                                                                                                              | Cost-effective |
| Target outreach screening interventions |                                                                                                                                                                                                         |                             |                                                                                                                                                         |                |
| Zhao et al., 2014, Australia            | A 10-year observational study with propensity score matching: providing primary care utilization for chronic disease management in remote indigenous communities to indigenous residents aged ≥15 years | Physician and non-physician | \$1,131–\$1,974/YLL for medium level of primary care;<br>\$3,422–\$5,637/YLL for high level of primary care                                             | Cost-effective |
| Yosefy et al., 2003, Israel             | A 2-year before-and-after comparison: examining 12,202 subjects, providing an outreach promotion of health education to                                                                                 | Physician and non-physician | –\$3,257/LYS; CBR: 0.22:1                                                                                                                               | Cost-saving    |

**Appendix**  
**A Systematic Review of Economic Evidence on Community Hypertension Interventions**  
**Zhang et al.**

---

3,506 identified  
patients with one or  
more CVD risk factors

---

ICER, incremental cost-effectiveness ratio; SBP, systolic blood pressure; DBP, diastolic blood pressure; RBR, relative benefit ratio; RSR, relative savings ratio; CBR, cost-benefit ratio; EI, educational intervention; SM, self-monitoring of blood pressure and follow-up intervention; SI, screening interventions; MNT, medical nutrition therapy; WTP, willingness to pay; LYS, life year saved; LYG, life year gained; QALY, quality-adjusted life years; YLL, years of life lost; DALY, disability-adjusted life years.

**Appendix**  
**A Systematic Review of Economic Evidence on Community Hypertension Interventions**  
**Zhang et al.**

**Appendix Table 2.** Quality of the Cost-effectiveness Studies on Community-based Interventions for Hypertension Control (N=34)

| <b>Criteria</b>                                                                                                     | <b>Studies,<br/>N</b> | <b>Percentage</b> |
|---------------------------------------------------------------------------------------------------------------------|-----------------------|-------------------|
| 1. Is the study population clearly described?                                                                       | 34                    | 100.00            |
| 2. Are competing alternatives clearly described?                                                                    | 25                    | 73.53             |
| 3. Is a well-defined research question posed in answerable form?                                                    | 34                    | 100.00            |
| 4. Is the economic study design appropriate to the stated objective?                                                | 23                    | 67.65             |
| 5. Is the chosen time horizon appropriate in order to include relevant costs and consequences?                      | 31                    | 91.18             |
| 6. Is the actual perspective chosen appropriate?                                                                    | 34                    | 100.00            |
| 7. Are all important and relevant costs for each alternative identified?                                            | 31                    | 91.18             |
| 8. Are all costs measured appropriately in physical units?                                                          | 34                    | 100.00            |
| 9. Are costs valued appropriately?                                                                                  | 16                    | 47.06             |
| 10. Are all important and relevant outcomes for each alternative identified?                                        | 23                    | 67.65             |
| 11. Are all outcomes measured appropriately?                                                                        | 34                    | 100.00            |
| 12. Are outcomes valued appropriately?                                                                              | 34                    | 100.00            |
| 13. Is an incremental analysis of costs and outcomes of alternatives performed?                                     | 31                    | 91.18             |
| 14. Are all future costs and outcomes discounted appropriately?                                                     | 29                    | 85.29             |
| 15. Are all important variables, whose values are uncertain, appropriately subjected to sensitivity analysis?       | 19                    | 55.88             |
| 16. Do the conclusions follow from the data reported?                                                               | 21                    | 61.76             |
| 17. Does the study discuss the generalizability of the results to other settings and patient/client groups?         | 26                    | 76.47             |
| 18. Does the article indicate that there is no potential conflict of interest of study researcher(s) and funder(s)? | 16                    | 47.06             |
| 19. Are ethical and distributional issues discussed appropriately?                                                  | 26                    | 76.47             |
